# Supplementary material for: Meta-Analysis of COVID-19 Metabolomics Identifies Variations in Robustness of Biomarkers
Source: MDPI journal article supplement (doi:10.3390/ijms241814371), 2023-09-21
Supplement: s1 [file s1]

# Meta-Analysis of COVID-19 Metabolomics Identifies Variations in Robustness of Biomarkers

## Supplementary Material

**Table S1.** optimised GridSearchCV parameters by panel.

| Panel                                  | C   | Penalty | Solver    |
|----------------------------------------|-----|---------|-----------|
| 1. Tomo <i>et al</i> (2022) [29]       | 0.1 | 'l2'    | liblinear |
| 2. Fraser <i>et al</i> (2020) [30]     | 0.1 | 'l2'    | liblinear |
| 3. Almulla <i>et al</i> (2022) [31]    | 0.1 | 'l2'    | liblinear |
| 4. Khodadoust <i>et al</i> (2021) [32] | 1.0 | 'l2'    | liblinear |
| 5. Caterino <i>et al</i> (2021) [33]   | 10  | 'l2'    | liblinear |
| 6. Crowdsourced Panel                  | 0.1 | 'l2'    | liblinear |

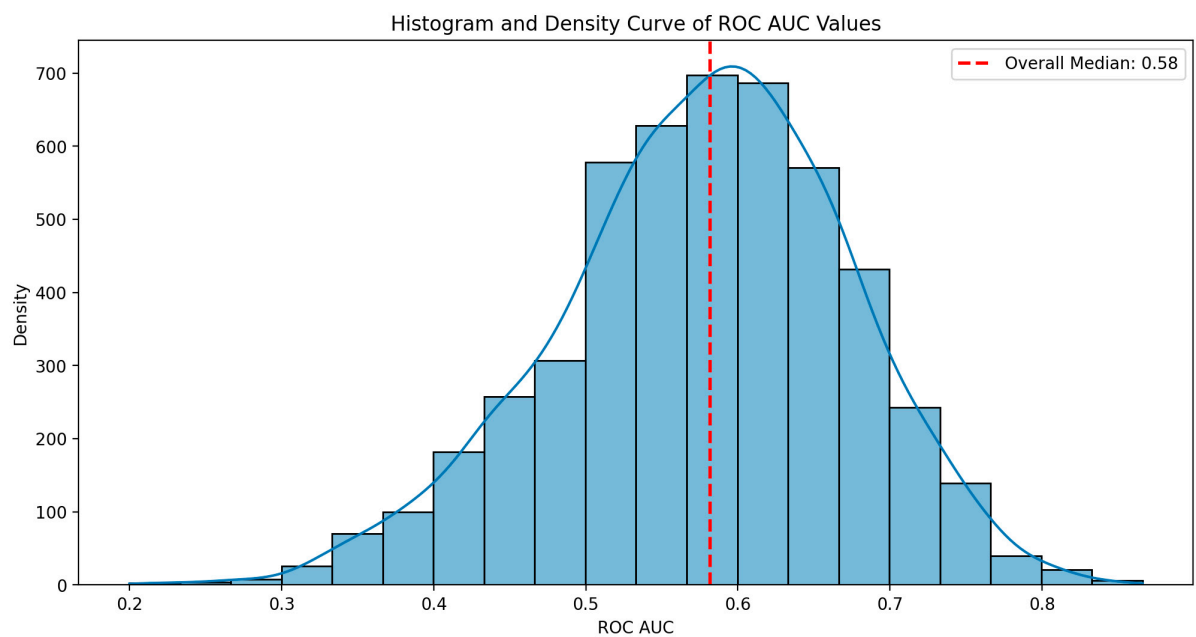

**Figure S1.** histogram and density plot of AUROC across 5 000 randomly generated biomarker panels, each comprising 5 metabolites selected at random from the independent dataset.

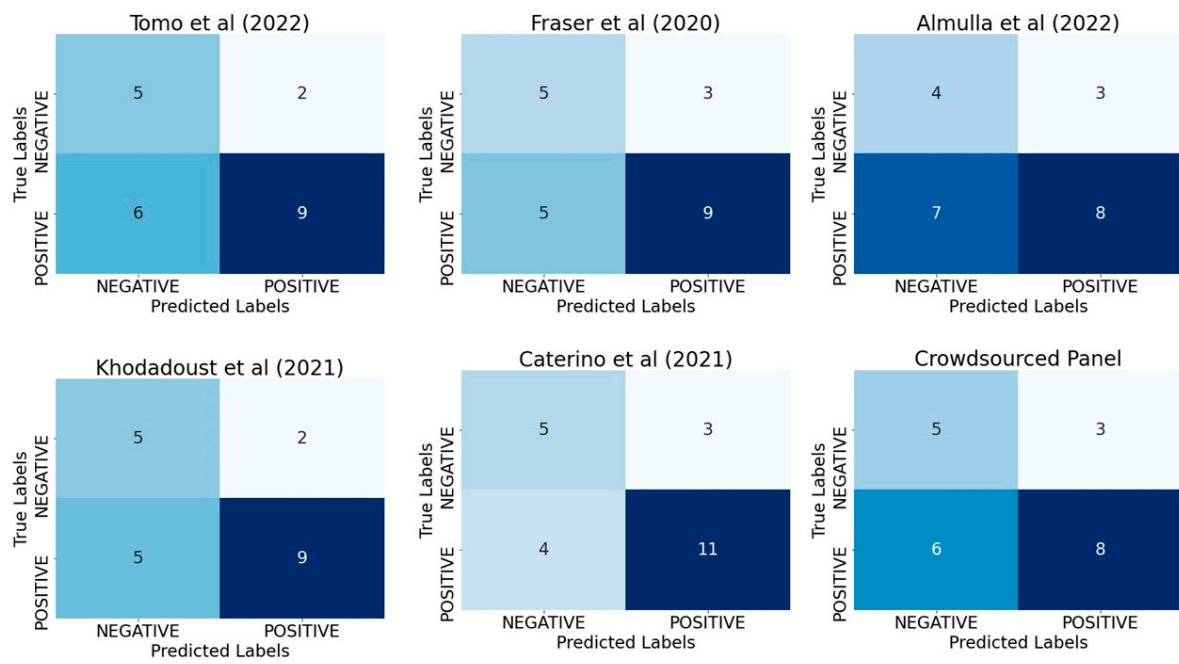

**Figure S2.** confusion matrices by panel.
